# Supplementary material for: A Facile Strategy for the Preparation of N-Doped TiO2 with Oxygen Vacancy via the Annealing Treatment with Urea
Source: MDPI journal article supplement (doi:10.3390/nano14100818), 2024-05-07
Supplement: s1 [file s1]

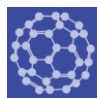

Supporting Materials

# A Facile Strategy for the Preparation of N-Doped TiO<sub>2</sub> with Oxygen Vacancy via the Annealing Treatment with Urea

Zhe Zhang <sup>1</sup>, Zhenpeng Cui <sup>1,2,\*</sup>, Yinghao Xu <sup>1</sup>, Mohamed Nawfal Ghazzal <sup>3</sup>, Christophe Colbeau-Justin <sup>3</sup>, Duoqiang Pan <sup>1,2</sup> and Wangsuo Wu <sup>1,2</sup>

<sup>1</sup> School of Nuclear Science and Technology, Lanzhou University, Lanzhou 730000, China

<sup>2</sup> Frontiers Science Center for Rare Isotopes, Lanzhou University, Lanzhou 730000, China

<sup>3</sup> Institute of Physical Chemistry, Paris-Saclay University, 91405 Orsay, France

\* Correspondence: cuizp@lzu.edu.cn

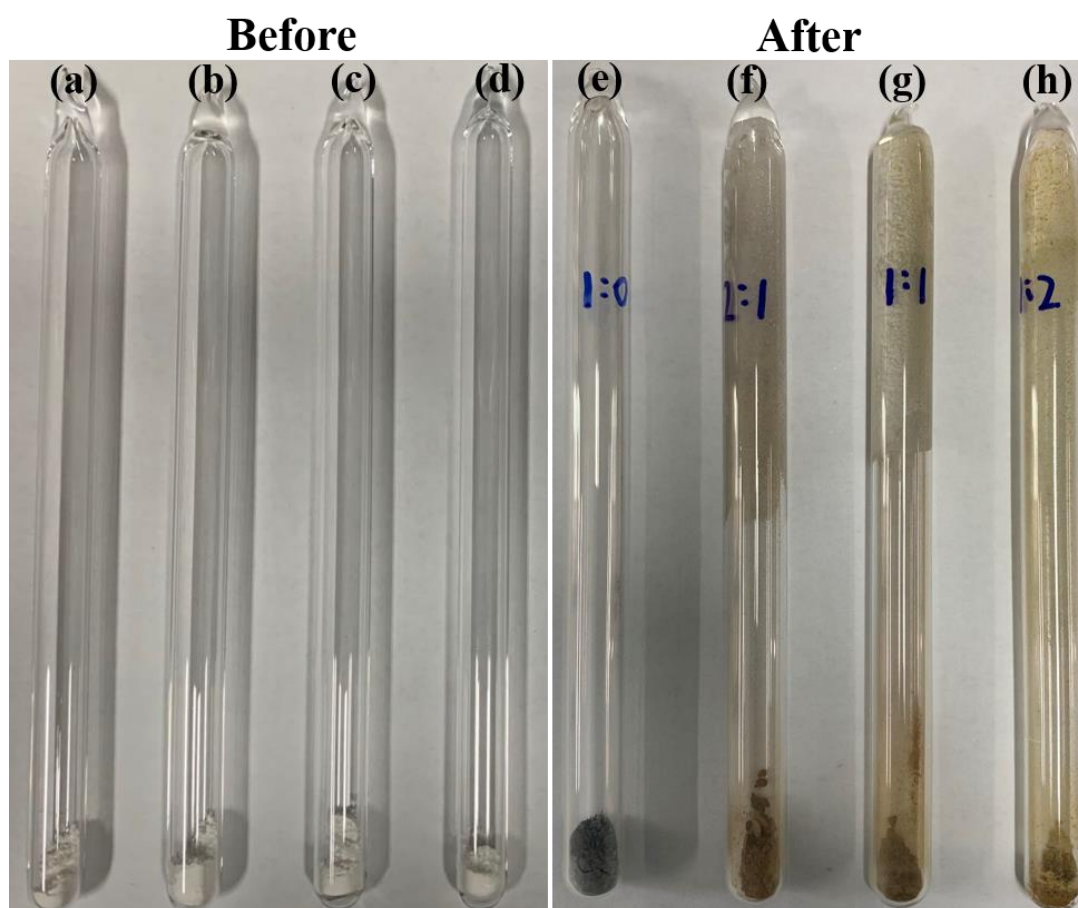

**Figure S1.** Digital photographs of TiO<sub>2</sub> and urea (a–d) before and (e–h) after the annealing treatment (500 °C, 2h). The weight ratios of TiO<sub>2</sub> to urea are (a, e) 1:0, (b, f) 2:1, (c, g) 1:1 and (d, h) 1:2, respectively.

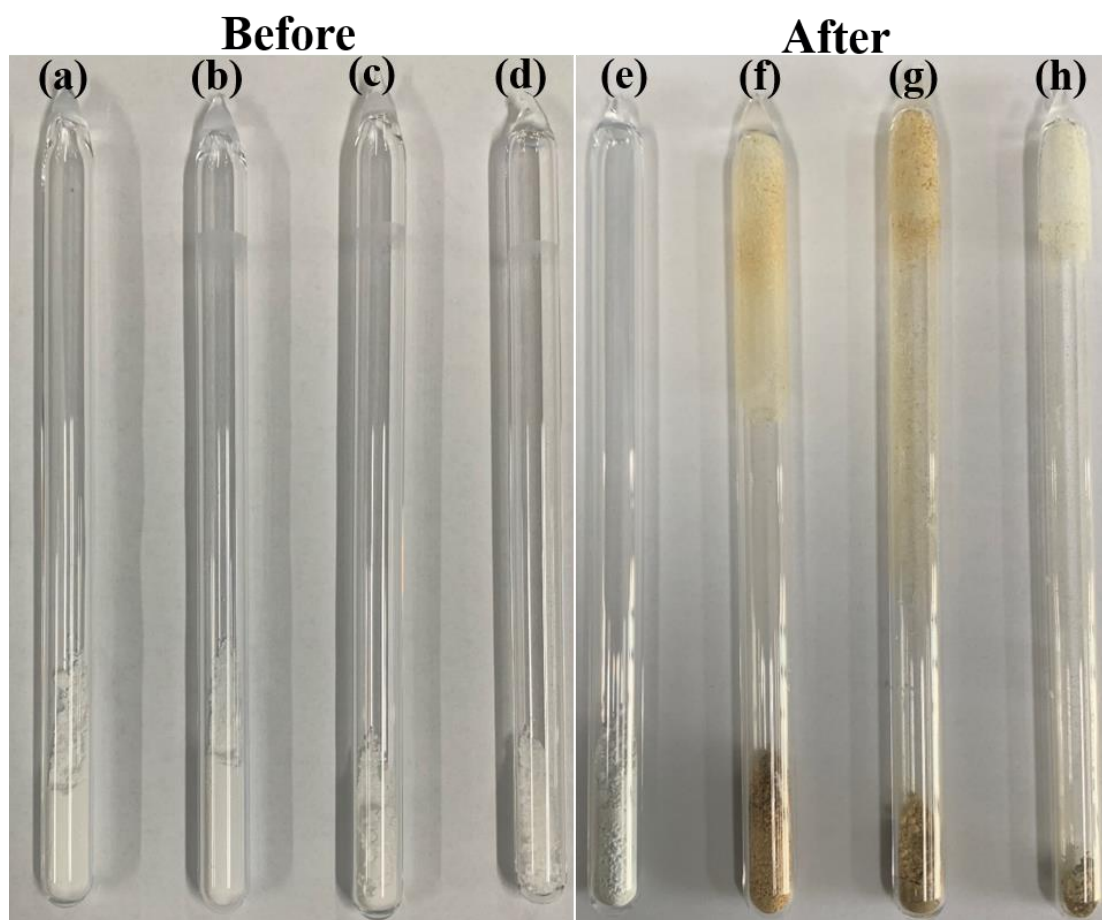

**Figure S2.** Digital photographs of P25 and urea (a-d) before and (e-h) after the annealing treatment (500 °C, 2h). The weight ratios of P25 to urea are (a, e) 1:0, (b, f) 2:1, (c, g) 1:1 and (d, h) 1:2, respectively.

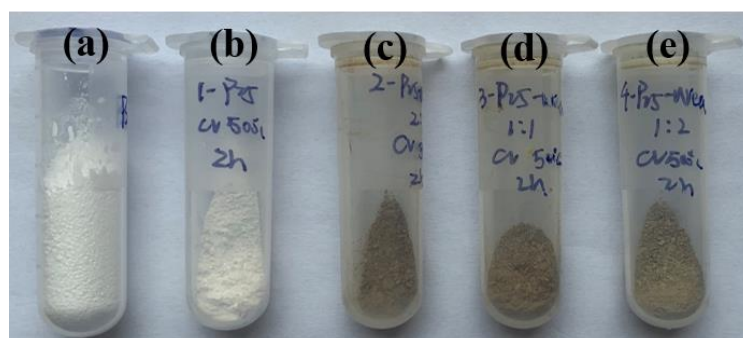

**Figure S3.** Digital photographs of (a) P25, (b) A-P25, (c) N-P25 (2:1), (d) N-P25 (1:1), and (e) N-P25 (1:2).

## Before After

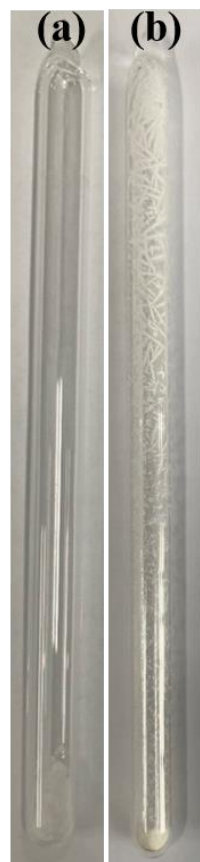

**Figure S4.** Digital photographs of urea (a) before and (b) after the annealing treatment (500 °C, 2h).

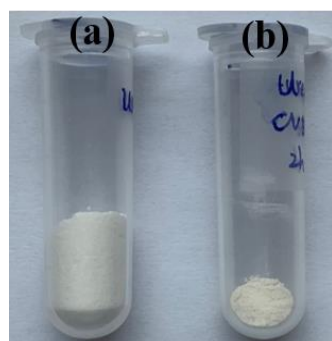

**Figure S5.** Digital photographs of the urea (a) before and (b) after the annealing treatment (500 °C, 2h).

**Table S1.** BET surface area of P25, A-P25, N-P25 (2:1), N-P25 (1:1), and N-P25 (1:2).

| Sample      | BET (m <sup>2</sup> /g) |
|-------------|-------------------------|
| P25         | 47.53                   |
| A-P25       | 31.85                   |
| N-P25 (2:1) | 47.54                   |
| N-P25 (1:1) | 48.74                   |
| N-P25 (1:2) | 38.86                   |

**Table S2.** Comparison of photocatalytic activity of N-TiO<sub>2</sub> photocatalyst for degradation of MO.

| Catalysts                | Conditions                        | Removal %      | Light source                            | Preparation method                    | Ref.      |
|--------------------------|-----------------------------------|----------------|-----------------------------------------|---------------------------------------|-----------|
| TON-2                    | MO (10 mg/L), Catalyst (1 g/L)    | 95% at 180 min | Xenon lamp with a 420 nm cut-off filter | Solvothermal method                   | 1         |
| N550                     | MO (20 mg/L), Catalyst (1 g/L)    | 50% at 300 min | LZC-420                                 | Hydrothermal method                   | 2         |
| NT3                      | MO (15 mg/L), Catalyst (0.3 g/L)  | 66% at 180 min | Xenon lamp with a 400 nm cut-off filter | Solvothermal method                   | 3         |
| 5N-TiO <sub>2</sub>      | MO (5 mg/L), Catalyst (/)         | 89% at 180 min | Metal halide lamp                       | Incipient wetness impregnation method | 4         |
| NTNTs-350                | MO (10 mg/L), Catalyst (1 g/L)    | 96% at 240 min | Fluorescent lamps                       | Hydrothermal                          | 5         |
| N-TiO <sub>2</sub>       | MO (20 mg/L), Catalyst (0.01 g/L) | 61% at 90 min  | Mercury lamp                            | Heat treatment                        | 6         |
| NT5.0                    | MO (20 mg/L), Catalyst (0.1 g/L)  | 10% at 150 min | Xenon lamp with a 400 nm cut-off filter | Hydrothermal                          | 7         |
| N-TiO <sub>2</sub> (1:2) | MO (25 mg/L), Catalyst(1 g/L)     | 70% at 120 min | Xenon lamp with a 420 nm cut-off filter | Hydrothermal Annealing treatment      | This work |

## References

- Yang, G.D.; Jiang, Z.; Shi, H.H.; Xiao, T.C.; Yan, Z.F. Preparation of highly visible-light active N-doped TiO<sub>2</sub> photocatalyst. *J. Mater. Chem.* **2010**, *20*, 5301–5309.
- Wang, J.; Tafen, D.N.; Lewis, J.P.; Hong, Z.L.; Manivannan, A.; Zhi, M.J.; Li, M.; Wu, N.Q. Origin of photocatalytic activity of nitrogen-doped TiO<sub>2</sub> nanobelts. *J. Am. Chem. Soc.* **2009**, *131*, 12290–12297.
- Gai, L.G.; Duan, X.Q.; Jiang, H.H.; Mei, Q.H.; Zhou, G.W.; Tian, Y.; Liu, H. One-pot synthesis of nitrogen-doped TiO<sub>2</sub> nanorods with anatase/brookite structures and enhanced photocatalytic activity. *CrystEngComm* **2012**, *14*, 7662–7671.
- Saien, J.; Mesgari, Z. Photocatalytic degradation of methyl orange using hematoporphyrin/N-doped TiO<sub>2</sub> nanohybrids under visible light: Kinetics and energy consumption. *Appl. Organomet. Chem.* **2017**, *31*, e3755.
- Peng, Y.; Lo, S.; Ou, H.; Lai, S. Microwave-assisted hydrothermal synthesis of N-doped titanate nanotubes for visible-light-responsive photocatalysis. *J. Hazard. Mater.* **2010**, *183*, 754–758.
- Xiong, Z.H.; Chen, H.Y.; Lu, L.L.; Shan, R.; Zhang, Y.Y.; Yuan, H.R.; Chen, Y. Nitrogen-doped TiO<sub>2</sub>/nitrogen-containing biochar composite catalyst as a photocatalytic material for the decontamination of aqueous organic pollutants. *ACS Omega* **2023**, *8*, 791–803.
- Zhou, X.S.; Peng, F.; Wang, H.J.; Yu, H.; Yang, J. Preparation of nitrogen doped TiO<sub>2</sub> photocatalyst by oxidation of titanium nitride with H<sub>2</sub>O<sub>2</sub>. *Mater. Res. Bull.* **2011**, *46*, 840–844.
